# Supplementary material
Source: PubMed Central journal article supplement (PMC2899930)
Supplement: pp.110.158477_1.pdf [file pp.110.158477_1.pdf]

**S. Figure S1**

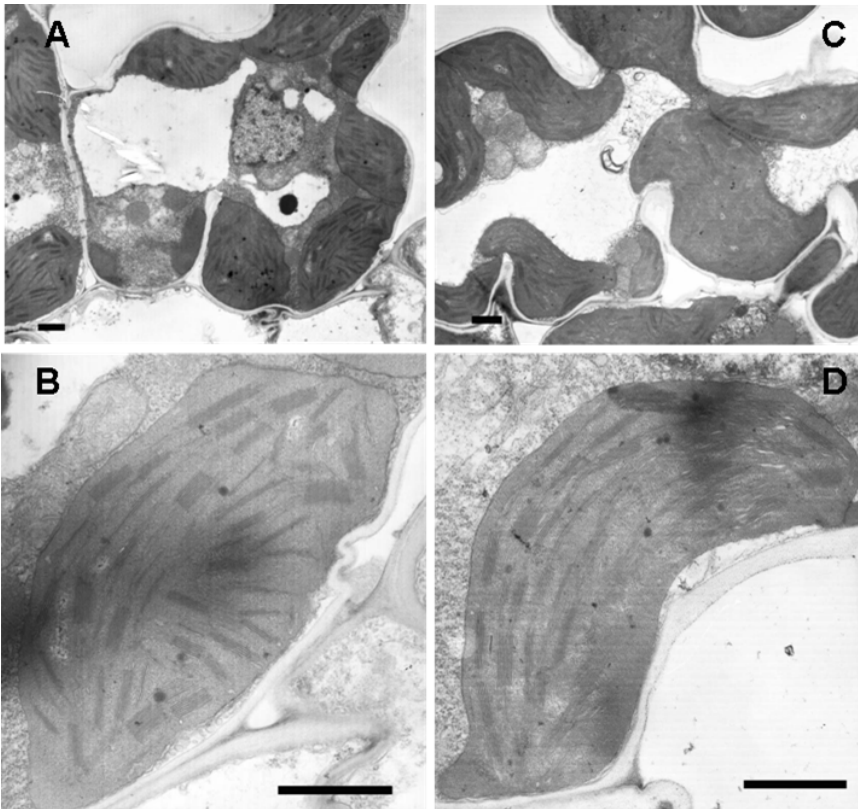

**Supplemental Figure S1.** Electron microscopic analysis of the rice *824ys* mutant. A and B, Mesophyll cells and chloroplasts of wild-type, respectively. C and D, Mesophyll cells and chloroplasts of *824ys* mutant, respectively. Bar equals 1 μm.

## S. Figure S2

```
1   ATGGCTGCCCTCCTCCTCCTCCCACCTCACCGCCGCTCCTCATCCTCCACCACGTCC
    M A A L L L S S H L T A A S S S S T T S
61  CCCACTGCTCGACCGGCGCCAAGCTTCGTCTCCTTCCGCGCCGCAACGCCGCCCTAAG
    P T A R P A P S F V S F R A A N A A P K
121 GGTGCCCGTCGGGGTTGGCCTTTCCCTTGGCTTCGTTCGGTAGAGCCACCGCCTGCTGCGTCG
    G A R R G W P F L A S S V E P P P A A S
181 GCGGCGCAGCCGTTCCGGTCACTGGCGCCGTCGGAGACCACCGTGTGTCACGGGCGCC
    A A Q P F R S L A P S E T T V L V T G A
241 ACGGGCTACATCGGGCGTTATGTCTCCGCGAGCTCCTCCGCCGCGCCACCCCGTGGTC
    T G Y I G R Y V V R E L L R R G H P V V
301 GCCGTGGCGCGCCCCCGGAGCGGGCTGCGCGGCCCAACGGCCCCGACGAGGTGCTGCGCG
    A V A R P R S G L R G R N G P D E V V A
361 GACCTCGCCCCCGCCGCGTCTCTTCTCCGACGTCACCGACGCGGGCGCGCTCCGCGCC
    D L A P A R V V F S D V T D A G A L R A
421 GACCTGTGCGCCGACGGCCCCATCCACGCCGCGGTGTGCTGCCTCGCCAGCCGCGGGCGG
    D L S P H G P I H A A V C C L A S R G G
481 GCGGTGCGGGACTCGTGGCGCGTGGACTACCGCGCCACGCTGCACACCCTCCAGGCGGGC
    G V R D S W R V D Y R A T L H T L Q A A
541 CGCGGCCTCGGCGCCGCGCACTTCGTCTCCTCCTCCTCCGCGTCTGCGTCCAGAAGCCGCTC
    R G L G A A H F V L L S A V C V Q K P L
601 CTCGAGTTCAGCGCGCCAAGCTCAGGTTTCGAGGGCGAGCTCGCCGCGGAGGCGTCCGCG
    L E F Q R A K L R F E G E L A A E A S R
661 GACCCGTCCTTACCTACAGCATCGTCCGCCCCACCGCCTTCTTCAAGAGCCTGGGCGGC
    D P S F T Y S I V R P T A F F K S L G G
721 CAGGTCGAGACCGTCAAGAACGGCCAGCCCTACGTCATGTTTCGGCGACGGGAAGCTCTGC
    Q V E T V K N G Q P Y V M F G D G K L C
781 GCCTGCAAGCCCATCAGCGAGGAGGACCTCGCCGCGTTCATCGCCGACTGCATCTCCGAC
    A C K P I S E E D L A A F I A D C I S D
841 GAGGGCAAGGCCAACAAGATCCTCCCCATCGGCGGGCCGGGAAGGCGCTGACGCCGCTG
    E G K A N K I L P I G G P G K A L T P L
901 GAGCAAGGGGAGATGCTGTTCCGGCTGCTGGGGCGCGAGCCCAGGTTTCATCAAGGTGCCG
    E Q G E M L F R L L G R E P R F I K V P
961 ATCCAGGTCATGGACGCCCATCTGGGTGCTCGACGCGCTGGCCAAGGTGTTCCCCGGG
    I Q V M D A A I W V L D A L A K V F P G
1021 GTGGAGGACCGGCGGAGTTCGGCAAGATCGGGAGGTAACGCGTTCGGAGAGCATGCTG
    V E D A A E F G K I G R Y Y A S E S M L
1081 GTGCTCGACCCGGACACCGGCGAGTACAGCGACGAGATGACGCCAGCTACGGCAGCGAC
    V L D P D T G E Y S D E M T P S Y G S D
1141 ACGCTCGAGCAGTTCTTCGAGAGGGTGATCAGGGAAGGCATGGCAGGGCAGGAGCTCGGC
    T L E Q F F E R V I R E G M A G Q E L G
1201 GAGCAGACCATCTTCTAG
    E Q T I F *
```

**Supplemental Figure S2.** Nucleotide sequence and deduced amino acid sequence of *OsDVR*.

Numbers at left refer to the positions of nucleotides. Letters in the box indicate the nine nucleotides and three amino acid residues deleted in 824ys mutant; Italic letters indicate the putative chloroplast-targeting sequence of 58 amino acid residues at its N terminus.

## S. Figure S3

|               |                                                                                               |     |
|---------------|-----------------------------------------------------------------------------------------------|-----|
| OsDVR         | ...MAALLSSHLTAASSSTTS...PTARPAFSVFSRAANAAPKARRGWPFCLASSVEPPAA.S.AAQ.P.FRALPASETTLVLT          | 78  |
| S.bicolor     | ...MAALLSSRLPTTGTATPS...SSTRPAPRFLSFPGTATRRRS...PLLASSAAPAPA...AAQP.FRALPASETTLVLT            | 70  |
| Z.mays        | ...MATILLSSRLPTTGTATP...SPTRPAPRFLSFPGTALRRRGRG...PLLASSAVSPAP.ASAAQP.YRALPASETTLVLT          | 74  |
| DVR_At5g18660 | MSLCSFNFVASYSPKPKTIFKDSKFISQFQVKSPLASTFFHTNESSTSLKYKRRLKPISSLDGSGIS.EIATSPSFRNKSPKIDINLVV     | 89  |
| C.reinhardtii | MLANKTSVSRQTAGKASSRAQAAIPLHLISSRVEVRASGVVVFSGVNVKASASAAPARAMAASRQAVRVAADVADYKREPKDVRVLVV      | 90  |
| SYNW0963      | .....MALRHDFSRPPEQVRVVV                                                                       | 20  |
| BciA_CT1063   | .....MSSSVLAESC.....GSQKKRFVV                                                                 | 22  |
| R.sphaeroides | .....MSETAP.....LPAPRRITLML                                                                   | 16  |
| OsDVR         | GATCYIGRYVRELLRRGHVVAVARPRSGLRGRNPDEVVADLAPARVVESDVTDAGALRADLSPHGP.IHAAVCCCLASRGGVQDSWR       | 167 |
| S.bicolor     | GATCYIGRYVRELLRRGHRVLAVARPRSGIRGRNSPEDVADLAPAQVVESDVTDPAALLADLAPHGP.VHAAVCCCLASRGGVQDSWR      | 159 |
| Z.mays        | GATCYIGRYVRELLRRGHRVLAVARPRSGIRGRNSPDDVADLAPAQVVESDVTDPAALLADLAPHGP.VHAAVCCCLASRGGVQDSWR      | 163 |
| DVR_At5g18660 | GSYCYIGRFVVKEMIKRGNVIAVARREKSGIRGKNDKEETLQQLQGANVCFSDVTELDVLEKSIENLGFQVDDVVVSCLASRNGIKDSWK    | 179 |
| C.reinhardtii | GPTCYIGKFFVVKELVSRGYNVAFARENAKIKGKMGREDIVKEFPGAVERFGSVLDPASLRDVAFKDPV..DVVVSCLASRTGKKDSWL     | 178 |
| SYNW0963      | GATCYIGRFVVEQELVBERGYQVVAFAFRERSGIGGRSQEQVIIDHKGAEVRFQVTDPAASIAAEAFNQPT..DVVVSCLASRTGGRNDSWA  | 108 |
| BciA_CT1063   | GATCYIGKFFVRELVSRGYEVIISFAFRERSGVNASTTEDETRRQLQGSSEVRFQVGNLESILRDGIRGEH.FDAVVSCLASRNGIKDSWD   | 111 |
| R.sphaeroides | GATGTIGQATARALLARGHEVVCFLRP.CGTRRQARLP.....DGAVLRVYGDVTDPSLTRDGFCEGER.FDAVVSCLASRTGVRDWA      | 98  |
| OsDVR         | VDMRATLHTLQAARGLGAHFVLLSAICVQKPILEFQRAKLRFEELAAEAASR.DPSFTYSVVRPTAFFKSLGGQVETVKNQGPVVMFGD     | 256 |
| S.bicolor     | VDMRATLHTLQAARGLGAHFVLLSAICVQKPILEFQRAKLRFEELAAEAAR.DPAFTYSVVRPTAFFKSLGGQVDIVKNQGPVVMFGD      | 248 |
| Z.mays        | VDMRATLHTLQAARGLGAHFVLLSAICVQKPILEFQRAKLRFEELAAEAAR.DPSFTYSVVRPTAFFKSLGGQVDIVKNQGPVVMFGD      | 252 |
| DVR_At5g18660 | IDYEATKNSLVAGKFKGAKHFVLLSAICVQKPILEFQRAKLRFEELMDLAQQDSSFTYSVVRPTAFFKSLGGQVETVKNQGPVVMFGD      | 269 |
| C.reinhardtii | IDYTAATKNSLDVARASGAKHFVLLSAICVQKPILEFQKAKLQFESDLQAAGDI.....TYSVVRPTAFFKSLAGQIDIVKKNQGPVVMFGD  | 263 |
| SYNW0963      | IDHCATLNTYREGRRAGVAHYVLLSAICVQKPILEFQKAKLFAFEELQADGEM.....TYSVVRPTAFFKSLGGQVESCRRKGGPVMVFGG   | 193 |
| BciA_CT1063   | IDYQATRNSLDAGMKAGINHFVLLSAICVQKPILEFQRAKLRFEELRESGVT.....TYSVVRPTAFFKSLAGQIEKVNKNQGPVVMFGD    | 195 |
| R.sphaeroides | IDHAAHSHALAAARAAGVTQVLLSAICVQKPILEFQCAKLAFAFEELMRSGLA.....WSVVRPTAFFKSLGGQVKRVQGRFVFGD        | 182 |
| OsDVR         | .....***                                                                                      |     |
| S.bicolor     | GKLCACKPISEEDLAAFIADCIYDQDKANKVLPVIGGPGKALTPLECGEMLRLLGREPKFKVPEIQVMDAAIHWLDLAKLFFGLEDAAE     | 346 |
| Z.mays        | GKLCACKPISEEDLAAFIADCIYDQDKANKVLPVIGGPGKALTPLECGEMLRLLGREPKFKVPEIQVMDAVIHWLDLAKLFFGLEDAAE     | 342 |
| DVR_At5g18660 | GKLCACKPISEEDLAAFIADCVLEENKINQVLPVIGGPGKALTPLECGELRLKILGREPKFLKVPPEINDFVIGVLDIAKIFPSVGEAAE    | 359 |
| C.reinhardtii | GNLAACKPISEADLASFADCVTEQNKVNVLPVIGGPGSAFTAKQCADLNFNITCLPPKYPFVPEVALMDGMIGLFDLAKLFFGLEDAE      | 353 |
| SYNW0963      | GETASCKPISEADLAREMADCLREDEKRNQVLPVIGGPGPALSAKQCGEMLRLLGREPKFLKVPPEIADLMDGPIALDEGLSRLFFGLEDAE  | 283 |
| BciA_CT1063   | GKLTACKPISEGDARFITLQLEDPEKQNKILPVGPGPEVNLQCALMLFELLGRKPKLKKVPEIQIFDVIITLPLTLISNPLPSFAEKAE     | 285 |
| R.sphaeroides | GKLTACKPISEDDDLGRYMLCLEEDPALRNRIILPVGPGPALTPRCAEMLRLLGREPKFKVPEIQVPEVALLDAILAVLSLGRLLLSLRDKAE | 272 |
| OsDVR         | FGKIGRYAASESMLVLDPTGEMSDEMTPSYGSDTLEQFFERVIREGMAGQBLGEQTI.....                                | 405 |
| S.bicolor     | FGKIGRYAASESMLLIDPETGEMSDKTPSYGKDTLEQFFQVIREGMAGQBLGEQTI.....                                 | 397 |
| Z.mays        | FGKIGRYAASESMLLIDPETGEMSDKTPSYGKDTLEQFFQVIREGMAGQBLGEQTI.....                                 | 401 |
| DVR_At5g18660 | FGKIGRYAASESMLLIDPETGEMSEKTPSYGKDTLEDFFAKVIREGMAGQBLGEQFF.....                                | 417 |
| C.reinhardtii | FARIGRYAASESMLVYDEARGVLEDETEFGYKDTLEDFFSAVKELGQBLGEQVAVGGQ.....                               | 415 |
| SYNW0963      | FRIGRYAASESMLVWDEPERQCDADATPSYGEDTLERFERVVRDGMAGQDLGDAALE.....                                | 342 |
| BciA_CT1063   | FARIGRYAASESMLVWDPVKRYDADATPSYGETETLRDHYKRVLKEGLAGQBLGAHAME.....                              | 344 |
| R.sphaeroides | LARIGRYAASESMLVLDPATGRMDAETPSFETETLEDHYRQLL.AGEATVLDGEHAVRERAVTAEGSPGN                        | 343 |

**Supplemental Figure S3.** Alignment of the deduced amino acid sequence of OsDVR and its homologues. Identical residues were boxed in black, similar residues ( $\geq 75\%$  identical) were highlighted in gray. The deletion of three amino acid residues (Lys, Val and Pro) was indicated with asterisks at the mutation site of 824ys mutant. Accession numbers for the respective protein sequences are as follows: *Oryza sativa* (OsDVR, Os03g22780, ADE43128); *Sorghum bicolor* (XP\_002465274); *Zea mays* (PCB2, NP\_001148282); *Arabidopsis thaliana* (DVR, At5G18660, NP\_197367); *Synechococcus* sp. WH 8102 (SYNW0963, NP\_897056); *Chlamydomonas reinhardtii* (XP\_001690168); *Chlorobium tepidum* TLS (BciA (CT1063), NP\_661954); and *Rhodobacter sphaeroides* (ZP\_00006667).
